# Supplementary material
Source: Springer Nature journal article supplement (https://www.springermedizin.de/resource/supplementary/13017_2013_296_MOESM1_ESM.pdf/9635884)
Supplement: MOESM1 [file 9635884]

| <i>Timing- iTTS<br/>from diagnosis</i> | <i>Possible Clinical Scenarios(TACS)</i>                                                                   | <i>Color<br/>code</i> | <i>Note</i>                                                                                                                                          |
|----------------------------------------|------------------------------------------------------------------------------------------------------------|-----------------------|------------------------------------------------------------------------------------------------------------------------------------------------------|
| Immediate surgery                      | Bleeding emergencies                                                                                       |                       | Immediate life saving surgical intervention, resuscitative laparotomy                                                                                |
| Within an hour                         | Incarcerated hernia, perforated viscus, diffuse peritonitis, soft tissue infection accompanied with sepsis |                       | Surgical Intervention as soon as possible but only after resuscitation (within 1 to 2 hours). administration of antibiotics upon diagnosis- no delay |
| Within 6 hours                         | Soft tissue infection (abscess) not accompanied with sepsis                                                |                       | Administration of antibiotics upon diagnosis- no delay                                                                                               |
| Within 12 hours                        | Appendicitis (local peritonitis), cholecystitis (optional )                                                |                       | Administration of antibiotics upon diagnosis- no delay                                                                                               |
| Within 24 or 48 hours                  | Second-look laparotomy                                                                                     |                       | Schedule in advance. Intervention should occur during day time                                                                                       |
